# Supplementary material for: Assessing Cognitive Abilities Using the WAIS-IV: An Item Response Theory Approach
Source: MDPI journal article supplement (doi:10.3390/ijerph18136835), 2021-06-25
Supplement: s1 [file s1]

**Table S1.** Item loadings, fit statistics, and item parameters for dichotomous WAIS-IV subtests.

| I                  | FA  | p-value $S-X^2$ |       | 2PLM     |          | R* | I                | FA   | p-value $S-X^2$ |       | 2PLM     |          | R* |
|--------------------|-----|-----------------|-------|----------|----------|----|------------------|------|-----------------|-------|----------|----------|----|
|                    |     | 2PLM            | 3PLM  | <i>a</i> | <i>b</i> |    |                  |      | 2PLM            | 3PLM  | <i>a</i> | <i>b</i> |    |
| Visual Puzzles     |     |                 |       |          |          |    | Matrix Reasoning |      |                 |       |          |          |    |
| 5                  | .80 | .78             | .07   | 2.47     | -3.43    | 5  | 4                | .85  | .71             | .65   | 3.51     | -3.23    | 7  |
| 6                  | .80 | .80             | .07   | 2.74     | -3.31    | 6  | 5                | .98  | .493            | .14   | 3.22     | -2.8     | 8  |
| 7                  | .66 | .236            | .236  | 1.04     | -3.18    | 7  | 6                | -.13 | .120            | .464  | .58      | -3.84    | 4  |
| 8                  | .42 | .249            | .158  | 1        | -1.37    | 8  | 7                | .23  | .354            | .129  | .99      | -3.26    | 6  |
| 9                  | .68 | .226            | .110  | 1.27     | -.41     | 10 | 8                | .41  | .563            | .507  | .57      | -1.72    | 10 |
| 10                 | .70 | .000*           | .000* | 1.66     | -.63     | 9  | 9                | .48  | .416            | .353  | .97      | -3.42    | 5  |
| 11                 | .76 | .402            | .196  | 1.39     | -.19     | 11 | 10               | .58  | .130            | .330  | .58      | -2.55    | 9  |
| 12                 | .60 | .540            | .297  | 1.91     | .17      | 12 | 11               | .29  | .576            | .443  | .66      | -1.17    | 11 |
| 13                 | .79 | .791            | .312  | 1.99     | .2       | 13 | 12               | .55  | .387            | .174  | .85      | -1.17    | 12 |
| 14                 | .43 | .010            | .030  | 1.65     | 1.08     | 17 | 13               | .75  | .512            | .182  | 1.55     | -.68     | 13 |
| 15                 | .81 | .201            | .180  | 2.36     | .65      | 14 | 14               | .66  | .177            | .053  | .99      | -.68     | 14 |
| 16                 | .82 | .235            | .118  | 2.47     | .79      | 15 | 15               | .65  | .077            | .016  | 1.24     | -.11     | 15 |
| 17                 | .80 | .003*           | .002* | 2.74     | .82      | 16 | 16               | .76  | .039            | .011  | 1.64     | -.08     | 16 |
| 18                 | .88 | .186            | .081  | 3.13     | 1.1      | 18 | 17               | .82  | .598            | .302  | 2.13     | -.04     | 17 |
| 19                 | .85 | .163            | .206  | 3.35     | 1.17     | 19 | 18               | .78  | .517            | .305  | 2.24     | .48      | 19 |
| 20                 | .67 | .057            | .027  | 2.94     | 1.57     | 20 | 19               | .81  | .080            | .039  | 2.82     | .44      | 18 |
| 21                 | .83 | .200            | .443  | 1.65     | .2       | 25 | 20               | .78  | .000*           | .000* | 2.56     | .53      | 20 |
| 22                 | .79 | .377            | .328  | 1.91     | 1.9      | 22 | 21               | .78  | .025            | .012  | 2.81     | .69      | 22 |
| 23                 | .62 | .042            | .007* | 2.76     | 1.97     | 24 | 22               | .82  | .011            | .008* | 3.51     | .59      | 21 |
| 24                 | .69 | .179            | .151  | 2.36     | 1.93     | 23 | 23               | .77  | .009*           | .008* | 3.22     | .69      | 23 |
| 25                 | .77 | .327            | .215  | 3.87     | 1.73     | 21 | 24               | .79  | .699            | .381  | 3.37     | .89      | 24 |
| 26                 | .62 | .210            | .009* | 3.35     | 2.57     | 26 | 25               | .63  | .159            | .077  | 2.56     | 1.34     | 25 |
|                    |     |                 |       |          |          |    | 26               | .58  | .502            | .087  | 1.79     | 1.99     | 26 |
| Picture Completion |     |                 |       |          |          |    | Figure Weights   |      |                 |       |          |          |    |
| I                  | FA  | p-value $S-X^2$ |       | 2PLM     |          | R* | I                | FA   | p-value $S-X^2$ |       | 2PLM     |          | R* |
|                    |     | 2PLM            | 3PLM  | <i>a</i> | <i>b</i> |    |                  |      | 2PLM            | 3PLM  | <i>a</i> | <i>b</i> |    |
| 2                  | .58 | .370            | .11   | 2.89     | -2.97    | 4  | 6                | .38  | .026            | .091  | .8       | -2.8     | 7  |
| 3                  | .65 | .510            | .009* | 1.90     | -3.52    | 2  | 7                | .86  | .488            | .072  | 1.37     | -3.54    | 6  |
| 4                  | .68 | .165            | .126  | 1.16     | -3.38    | 3  | 8                | .56  | .201            | .011  | .8       | -2.31    | 8  |
| 5                  | .81 | .195            | .099  | .66      | -.62     | 6  | 9                | .91  | .028            | .015  | 2.27     | -1.82    | 10 |
| 6                  | .27 | .014            | .010  | .76      | -1.15    | 5  | 10               | .46  | .086            | .084  | 1.28     | -2.22    | 9  |
| 7                  | .73 | .080            | .039  | .76      | -.59     | 7  | 11               | .78  | .259            | .093  | 1.82     | -1.61    | 11 |
| 8                  | .20 | .003*           | .001* | 1.00     | .33      | 12 | 12               | .45  | .184            | .219  | .87      | -1.57    | 12 |
| 9                  | .14 | .015            | .005* | 1.97     | .01      | 9  | 13               | .71  | .336            | .156  | 1.23     | -1.36    | 13 |
| 10                 | .83 | .005*           | .001* | 2.89     | -.18     | 8  | 14               | .54  | .259            | .015  | 1.05     | -.2      | 15 |
| 11                 | .33 | .004*           | .005* | 2.06     | .78      | 14 | 15               | .74  | .068            | .029  | 1.9      | -.3      | 14 |
| 12                 | .85 | .007*           | .008* | 2.69     | .26      | 11 | 16               | .64  | .055            | .004* | 1.44     | .26      | 18 |
| 13                 | .41 | .036            | .009* | 3.98     | .15      | 10 | 17               | .69  | .000*           | .004* | 2.79     | -.17     | 16 |
| 14                 | .76 | .366            | .115  | 3.94     | .49      | 13 | 18               | .80  | .026            | .148  | 2.42     | .25      | 17 |
| 15                 | .44 | .089            | .150  | 2.28     | 1.82     | 19 | 19               | .88  | .128            | .133  | 3.61     | .42      | 19 |
| 16                 | .40 | .006*           | .003* | 1.98     | 1.58     | 16 | 20               | .82  | .274            | .005* | 3.61     | .97      | 21 |
| 17                 | .74 | .177            | .136  | 2.19     | 1.39     | 15 | 21               | .79  | .019            | .001* | 3.71     | .72      | 20 |
| 18                 | .60 | .135            | .101  | 1.97     | 1.64     | 17 | 22               | .74  | .002*           | .017  | 2.96     | 1.2      | 24 |
| 19                 | .61 | .019            | .001* | 3.42     | 1.98     | 20 | 23               | .82  | .029            | .123  | 3.28     | 1.11     | 23 |
| 20                 | .99 | .345            | .163  | 2.69     | 1.77     | 18 | 24               | .83  | .278            | .176  | 3.71     | .99      | 22 |
| 21                 | .99 | .086            | .028  | 2.06     | 2.48     | 23 | 25               | .86  | .236            | .009* | 2.79     | 1.28     | 25 |
| 22                 | .66 | .128            | .052  | 2.92     | 2.32     | 22 | 26               | .75  | .022            | .000* | 2.65     | 1.57     | 27 |
| 23                 | .99 | .214            | .124  | 2.28     | 2.05     | 21 | 27               | .81  | .138            | .091  | 2.79     | 1.5      | 26 |
| 24                 | .66 | .12             | .066  | 1.98     | 3.32     | 24 |                  |      |                 |       |          |          |    |

| I           | FA  | p-value S- $X^2$ |       | 2PLM     |          | R* | I          | FA  | p-value S- $X^2$ |      | 2PLM     |          | R* |
|-------------|-----|------------------|-------|----------|----------|----|------------|-----|------------------|------|----------|----------|----|
|             |     | 2PLM             | 3PLM  | <i>a</i> | <i>b</i> |    |            |     | 2PLM             | 3PLM | <i>a</i> | <i>b</i> |    |
| Information |     |                  |       |          |          |    | Arithmetic |     |                  |      |          |          |    |
| I           | FA  | p-value S- $X^2$ |       | 2PLM     |          | R* | I          | FA  | p-value S- $X^2$ |      | 2PLM     |          | R* |
|             |     | 2PLM             | 3PLM  | a        | b        |    |            |     | 2PLM             | 3PLM | a        | b        |    |
| 4           | .84 | .181             | .31   | 1.26     | -3.99    | 4  | 6          | .60 | .39              | .41  | 1.98     | -3.78    | 6  |
| 5           | .51 | .388             | .866  | 1.1      | 2.36     | 20 | 7          | .73 | .49              | .39  | 2.00     | -3.76    | 7  |
| 6           | .45 | .134             | .198  | .67      | -2.77    | 5  | 8          | .61 | .606             | .201 | 1.89     | -2.75    | 8  |
| 7           | .84 | .388             | .451  | 1.29     | -2.14    | 8  | 9          | .73 | .381             | .162 | 1.03     | -1.76    | 10 |
| 8           | .59 | .203             | .102  | .67      | .69      | 13 | 10         | .84 | .221             | .116 | 1.07     | -2.11    | 9  |
| 9           | .70 | .693             | .418  | 1.17     | -.47     | 9  | 11         | .78 | .301             | .116 | 1.27     | -.39     | 12 |
| 10          | .90 | .170             | .146  | 1.26     | -2.69    | 6  | 12         | .85 | .628             | .735 | 1.39     | -.72     | 11 |
| 11          | .26 | .161             | .071  | 1.08     | 2.96     | 21 | 13         | .89 | .295             | .066 | 1.50     | -.11     | 13 |
| 12          | .67 | .241             | .172  | .78      | -2.6     | 7  | 14         | .95 | .216             | .098 | 2.02     | .23      | 14 |
| 13          | .55 | .365             | .144  | 1.47     | -.02     | 10 | 15         | .81 | .200             | .062 | 2.40     | .41      | 15 |
| 14          | .84 | .173             | .059  | 1.85     | 1.19     | 15 | 16         | .78 | .256             | .107 | 2.13     | .81      | 17 |
| 15          | .44 | .018             | .004* | 2        | .73      | 14 | 17         | .78 | .705             | .415 | 2.85     | .89      | 19 |
| 16          | .87 | .018             | .001* | 3.91     | .31      | 11 | 18         | .89 | .437             | .230 | 3.20     | .84      | 18 |
| 17          | .96 | .039             | .002* | 3.91     | .33      | 12 | 19         | .95 | .732             | .646 | 3.00     | .76      | 16 |
| 18          | .31 | .025             | .027  | 2.11     | 3.04     | 22 | 20         | .81 | .122             | .100 | 2.80     | 1.63     | 20 |
| 19          | .75 | .025             | .016  | 2.14     | 1.35     | 16 | 21         | .78 | .293             | .239 | 2.64     | 1.73     | 21 |
| 20          | .86 | .422             | .449  | 2.51     | 1.54     | 17 | 22         | .78 | .141             | .210 | 2.61     | 2.00     | 22 |
| 21          | .83 | .352             | .232  | 3.06     | 1.83     | 18 |            |     |                  |      |          |          |    |
| 22          | .30 | .205             | .039  | 1.42     | 3.37     | 24 |            |     |                  |      |          |          |    |
| 23          | .70 | .334             | .007* | 3.59     | 2.31     | 19 |            |     |                  |      |          |          |    |
| 24          | .72 | .151             | .025  | 1.47     | 3.5      | 25 |            |     |                  |      |          |          |    |
| 25          | .77 | .534             | .022  | 2        | 3.13     | 23 |            |     |                  |      |          |          |    |
| 26          | .78 | .020             | .017  | 1.85     | 3.67     | 26 |            |     |                  |      |          |          |    |

Note. I= item,  $a$  = discrimination parameter;  $b$  = difficulty parameter; FA = item loading in factor analysis,

R\* = rank; 2PLM = two-parameter logistic model; 3PLM = three-parameter logistic model

\* $p < .01$

**Table S2.** Item loadings, fit statistics, and item parameters for polytomous WAIS-IV subtests.

| I            | FA  | PCM<br>-R       | PCM-<br>1PL | GPCM  | GRM   | GRM  |       |       |      |      | Mean<br>threshold | Rank* |
|--------------|-----|-----------------|-------------|-------|-------|------|-------|-------|------|------|-------------------|-------|
|              |     | p-value $S-X^2$ |             |       |       | $a$  | $b1$  | $b2$  | $b3$ | $b4$ |                   |       |
| Similarities |     |                 |             |       |       |      |       |       |      |      |                   |       |
| 6            | .40 | .274            | .479        | .061  | .371  | 1.30 | -3.32 | -3.19 |      |      | -3.26             | 6     |
| 7            | .15 | .021            | .073        | .573  | .000* | 1.15 | -3.91 | -.31  |      |      | -2.11             | 7     |
| 8            | .45 | .000*           | .000*       | .006* | .006* | .65  | -1.31 | -.77  |      |      | -1.04             | 8     |
| 9            | .43 | .117            | .354        | .584  | .640  | .75  | -1.04 | 1.40  |      |      | .18               | 10    |
| 10           | .50 | .009*           | .093        | .523  | .446  | .80  | -.76  | -.09  |      |      | -.43              | 9     |
| 11           | .62 | .262            | .315        | .211  | .609  | 1.30 | .82   | 2.54  |      |      | 1.68              | 15    |
| 12           | .64 | .348            | .381        | .328  | .372  | 1.30 | 1.12  | 1.35  |      |      | 1.24              | 12    |
| 13           | .58 | .001*           | .002*       | .005* | .0102 | 1.31 | 1.25  | 1.89  |      |      | 1.57              | 14    |
| 14           | .83 | .003*           | .000*       | .024  | .028  | 3.18 | .75   | 1.38  |      |      | 1.07              | 11    |
| 15           | .88 | .004*           | .000*       | .019  | .001* | 1.15 | .88   | 1.60  |      |      | 1.24              | 13    |
| 16           | .68 | .019            | .005*       | .023  | .005* | 2.36 | 1.70  | 2.16  |      |      | 1.93              | 16    |
| 17           | .84 | .137            | .041        | .672  | .428  | 3.18 | 1.55  | 3.01  |      |      | 2.28              | 17    |
| 18           | .74 | .154            | .058        | .183  | .205  | 1.85 | 1.77  | 3.35  |      |      | 2.56              | 18    |
| Vocabulary   |     |                 |             |       |       |      |       |       |      |      |                   |       |
| 6            | .16 | .000*           | .000*       | .015  | .026  | .76  | -2.98 | -2.25 |      |      | -2.62             | 10    |
| 7            | .09 | .001*           | .000*       | .025  | .057  | .86  | -3.80 | -2.24 |      |      | -3.02             | 7     |
| 8            | .33 | .005*           | .022        | .647  | .580  | .65  | -3.53 | -2.78 |      |      | -3.16             | 6     |
| 9            | .26 | .000*           | .000*       | .029  | .062  | .38  | -2.69 | 1.54  |      |      | -.58              | 14    |
| 10           | .25 | .000*           | .000*       | .014  | .000* | .79  | -3.29 | -.83  |      |      | -2.06             | 11    |
| 11           | .26 | .000*           | .000*       | .009* | .004* | .90  | -2.81 | -2.52 |      |      | -2.67             | 9     |
| 12           | .30 | .011            | .020        | .235  | .021  | 1.06 | -3.02 | -2.54 |      |      | -2.78             | 8     |
| 13           | .60 | .000*           | .014        | .009* | .006* | 1.04 | -.59  | -.47  |      |      | -.53              | 19    |
| 14           | .44 | .000*           | .053        | .042  | .042  | .65  | .96   | 1.21  |      |      | 1.09              | 27    |
| 15           | .54 | .000*           | .004*       | .000* | .005* | .97  | -.96  | -.16  |      |      | -.56              | 15    |
| 16           | .79 | .136            | .126        | .116  | .062  | .86  | -1.75 | -.99  |      |      | -1.37             | 12    |
| 17           | .44 | .000*           | .000*       | .000* | .002* | .91  | 1.09  | 1.53  |      |      | 1.31              | 29    |
| 18           | .67 | .009*           | .000*       | .005* | .009* | .79  | -1.24 | .16   |      |      | -.54              | 17    |
| 19           | .66 | .257            | .401        | .301  | .396  | .90  | -.49  | -.20  |      |      | -.35              | 21    |
| 20           | .82 | .148            | .094        | .079  | .092  | 2.07 | -.67  | -.44  |      |      | -.56              | 16    |
| 21           | .96 | .019            | .000*       | .188  | .228  | 3.50 | -.91  | -.71  |      |      | -.81              | 13    |
| 22           | .77 | .005*           | .018        | .000* | .001* | 2.18 | -.87  | 1.04  |      |      | .09               | 24    |
| 23           | .70 | .294            | .379        | .273  | .372  | 1.06 | -.47  | -.04  |      |      | -.26              | 22    |
| 24           | .67 | .192            | .212        | .098  | .186  | .76  | .25   | .45   |      |      | .35               | 26    |
| 25           | .92 | .082            | .029        | .065  | .028  | 3.20 | -.59  | -.48  |      |      | -.54              | 18    |
| 26           | .86 | .000*           | .000*       | .000* | .000* | 2.35 | -.79  | -.21  |      |      | -.50              | 20    |
| 27           | .80 | .002*           | .003*       | .011  | .004* | 2.37 | -.50  | .45   |      |      | -.03              | 23    |
| 28           | .59 | .001*           | .000*       | .000* | .000* | 1.26 | -.31  | 2.77  |      |      | 1.23              | 28    |
| 29           | .37 | .022            | .026        | .015  | .015  | .77  | 2.97  | 3.04  |      |      | 3.01              | 30    |
| 30           | .70 | .162            | .222        | .104  | .064  | 2.13 | .13   | .18   |      |      | .16               | 25    |
| Block Design |     |                 |             |       |       |      |       |       |      |      |                   |       |
| 9            | .44 | .006*           | .0001*      | .092  | .157  | 1.05 | -1.06 | .72   | 1.94 | 4.01 | 1.40              | 9     |
| 10           | .72 | .120            | .112        | .103  | .161  | 1.90 | .06   | 1.37  | 1.87 | 3.21 | 1.63              | 11    |
| 11           | .75 | .029            | .028        | .058  | .107  | 2.34 | 1.23  | 2.04  | 2.14 | 2.90 | 2.08              | 13    |
| 12           | .91 | .046            | .184        | .0101 | .082  | 4.10 | 1.08  | 1.65  | 1.84 |      | 1.52              | 10    |
| 13           | .91 | .351            | .390        | .502  | .418  | 4.98 | 1.43  | 1.80  | 2.03 |      | 1.75              | 12    |
| 14           | .87 | .020            | .006*       | .062  | .051  | 4.54 | 1.78  | 2.23  | 2.56 |      | 2.19              | 14    |

| I                        | FA  | PCM<br>-R       | PCM-<br>1PL | GPCM | GRM  | GRM  |       |       |      |      | Mean<br>threshold | Rank* |
|--------------------------|-----|-----------------|-------------|------|------|------|-------|-------|------|------|-------------------|-------|
|                          |     | p-value $S-X^2$ |             |      |      | $a$  | $b1$  | $b2$  | $b3$ | $b4$ |                   |       |
| Digit Span               |     |                 |             |      |      |      |       |       |      |      |                   |       |
| F4                       | .33 | .13             | .15         | .31  | .23  | .99  | -4.83 | -1.65 |      |      | -3.24             | F4    |
| F5                       | .60 | .94             | .91         | .95  | .87  | 1.39 | -1.37 | -.07  |      |      | -.72              | F5    |
| F6                       | .66 | .29             | .19         | .43  | .45  | 1.42 | -.25  | .95   |      |      | .35               | F6    |
| F7                       | .71 | .21             | .18         | .20  | .08  | 1.61 | .63   | 1.77  |      |      | 1.20              | F7    |
| F8                       | .70 | .11             | .03         | .20  | .18  | 2.06 | 1.49  | 2.18  |      |      | 1.84              | F8    |
| B3                       | .26 | .15             | .03         | .73  | .56  | .57  | -7.33 | -1.36 |      |      | -4.35             | B3    |
| B4                       | .61 | .48             | .31         | .39  | .40  | 1.36 | -1.11 | .36   |      |      | -.38              | B4    |
| B5                       | .74 | .15             | .15         | .08  | .09  | 1.96 | .10   | 1.13  |      |      | .62               | B5    |
| B6                       | .77 | .18             | .15         | .03  | .14  | 2.65 | .94   | 1.77  |      |      | 1.36              | B6    |
| B7                       | .75 | .07             | .047        | .02  | .054 | 3.96 | 1.35  | 1.96  |      |      | 1.66              | B7    |
| B8                       | .61 | .16             | .10         | .02  | .15  | 4.28 | 1.70  | 2.04  |      |      | 1.87              | B8    |
| S4                       | .44 | .60             | .50         | .67  | .52  | 1.06 | -2.44 | -.15  |      |      | -1.30             | S4    |
| S5                       | .54 | .09             | .054        | .18  | .22  | 1.24 | -.86  | .69   |      |      | -.09              | S5    |
| S6                       | .61 | .91             | .86         | .88  | .75  | 1.33 | .97   | 2.23  |      |      | 1.60              | S6    |
| S7                       | .65 | .68             | .51         | .63  | .67  | 1.91 | 1.65  | 2.66  |      |      | 2.16              | S7    |
| S8                       | .61 | .16             | .10         | .34  | .33  | 2.20 | 1.91  | 3.24  |      |      | 2.58              | S8    |
| Letter-Number Sequencing |     |                 |             |      |      |      |       |       |      |      |                   |       |
| 4                        | .59 | .945            | .775        | .128 | .401 | 1.23 | -3.75 | -3.31 |      |      | -3.53             | 4     |
| 5                        | .20 | .332            | .211        | .312 | .082 | 1.27 | -2.93 | -1.41 |      |      | -2.17             | 5     |
| 6                        | .07 | .244            | .184        | .938 | .283 | 1.23 | -2.30 | -.53  |      |      | -1.42             | 6     |
| 7                        | .86 | .131            | .129        | .398 | .102 | 1.27 | -1.52 | -.11  | 1.43 |      | -.07              | 7     |
| 8                        | .74 | .571            | .372        | .605 | .097 | 1.23 | .48   | 1.38  | 2.78 |      | 1.55              | 8     |
| 9                        | .93 | .033            | .039        | .565 | .312 | 3.25 | 1.22  | 2.31  | 2.67 |      | 2.07              | 9     |
| 10                       | .93 | .038            | .016        | .557 | .402 | 2.77 | 2.23  | 3.15  |      |      | 2.69              | 10    |

Note. *a* = discrimination parameter; *b1*- *b4* = location parameter for a specific category; Digit Span: F = Forward. B = Backward. S = Sequencing; FA = item loading in factor analysis; PCM-R = partial credit model-Rasch model; PCM-1PL = one-parameter partial credit model; GPCM = generalized partial credit model; GRM = graded response model.

\**p* < .01
